# Supplementary material for: A Thiosemicarbazone-Derived Fluorescent Probe For The Detection Of Silver Ions And Bioimaging Application
Source: Research Square preprint supplement (doi:10.21203/rs.3.rs-8086522/v1), 2025-12-04
Supplement: Supplementary file 1 [file 46942932d7b391bc3ff33a19.docx]

**Supporting Information**

**A Thiosemicarbazone-Derived Fluorescent Probe For The Detection Of Silver Ions And Bioimaging Application.**

1. **Sreedevia, G. Prabhakaranb, Nattamai Bhuvaneshc, Malathi Mahalinhamd, Raju Nandhakumarb, G. Subashinia***

*a Department of Chemistry, PSGR Krishnammal College for Women,*

*Peelamedu, Coimbatore-641004, Tamilnadu, India.*

**E-mail: gsubashini2010@gmail.com*

*b Fluorensic Materials Lab, Department of Applied Chemistry,*

*Karunya Institute of Technology and Sciences, (Deemed-to-be University),*

*Karunya Nagar,Coimbatore - 641 114, India.*

***c*** *Department of Chemistry, Texas A&M University, United States.*

*d Department of Chemistry, Bannari Amman Institute of Technology*

**CONTENTS**

**S1. Figure S1.** FTIR Spectrum of compound **2NP**

**S2. Figure S2.** 1H NMR Spectrum of compound **2NP**

**S3. Figure S3.** 13C NMR Spectrum of compound **2NP**

**S4. Figure S4.** HRMS Spectrum of compound **2NP**

**S5. Figure S5.** Absorbance Spectrum of compound **2NP**

**S6. Figure S6.** The response time study of receptor **2NP to Ag+.**

**S7. Figure S7.** Job’s plot variation technique showing 2:1 complexation for receptor **2NP** and Ag+ in HEPES (50 mM) buffered DMSO-H2O, 1:1 (v/v) solution (pH = 7.4) at λex = 520 nm.

**S8. Figure S8.** HRMS Spectrum of compound **2NP+Ag**

**S9. Figure S9.** Benesi-Hildebrand plot for determination of association constant for receptor **2NP** in presence of various concentration of Ag+ at (λex = 520 nm). Error bars are representing standard deviation of three repeated experiments.

**S10. Figure S10.** 1H NMR Titration Spectrum of compound 2NP with 4 equiv. Ag+ ions.

**Table S1.** Comparison of Bond lengths of the free 2NP and complex 2NP+ Ag+ ions

**Table S2** Cytotoxicity studies with L929 Mouse fibroblast cells.


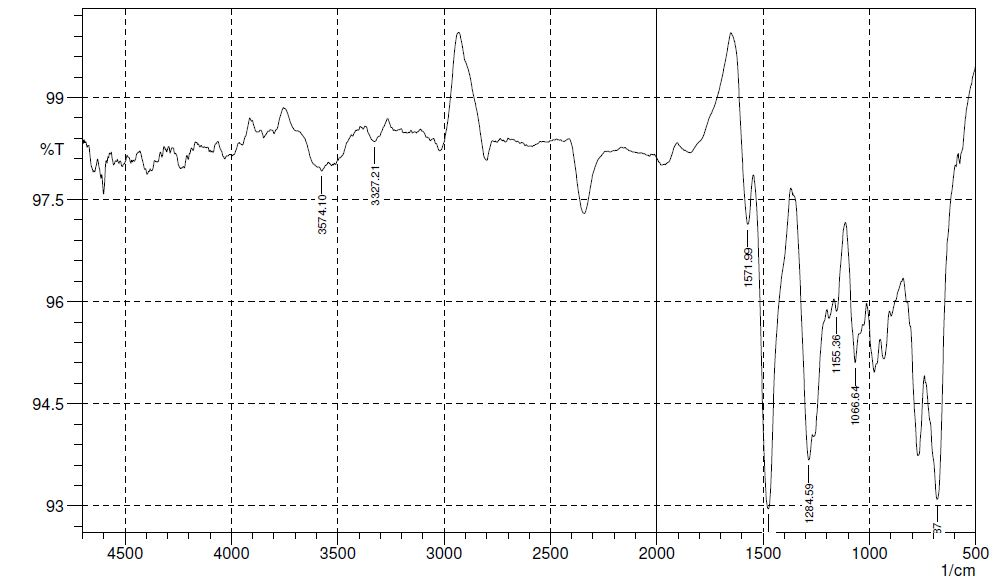


**Figure S1.** FTIR Spectrum of compound **2NP**


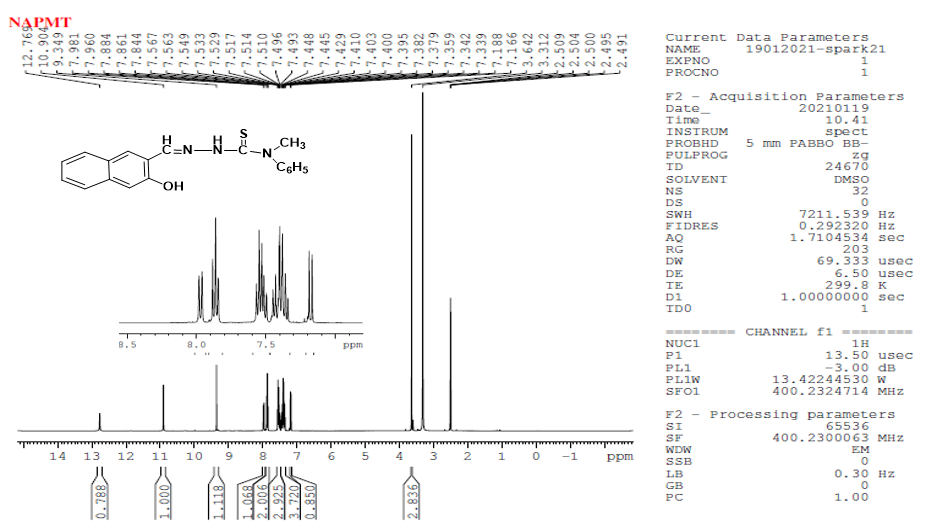


**Figure S2.** 1H NMR Spectrum of compound **2NP**


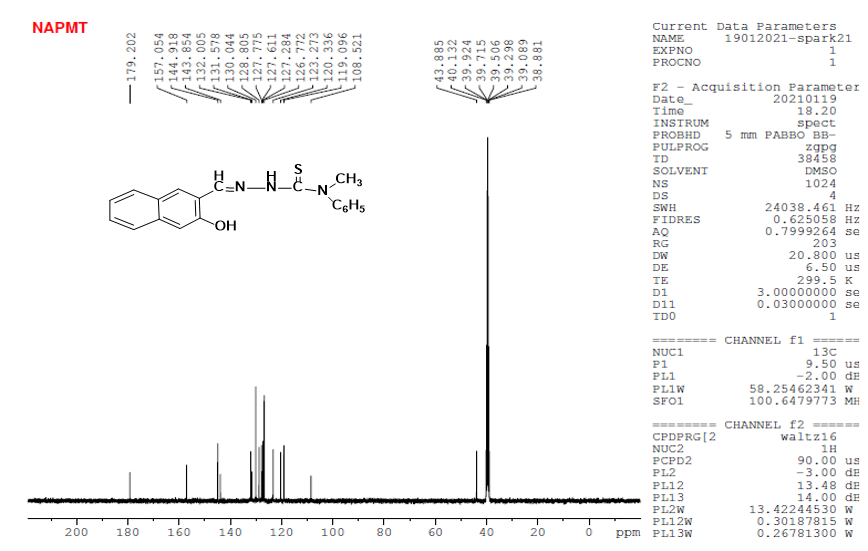


**Figure S3.** 13C NMR Spectrum of compound **2NP**


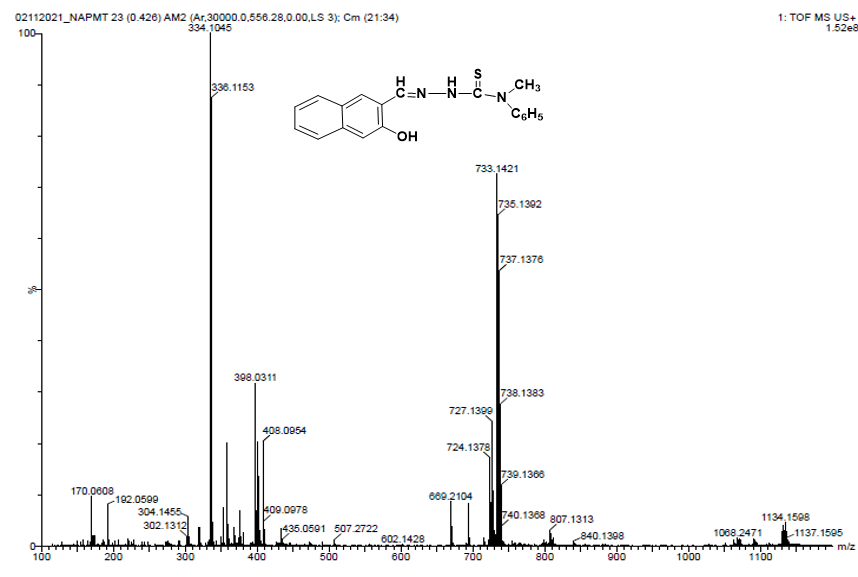


**Figure S4.** HRMS Spectrum of compound **2NP**


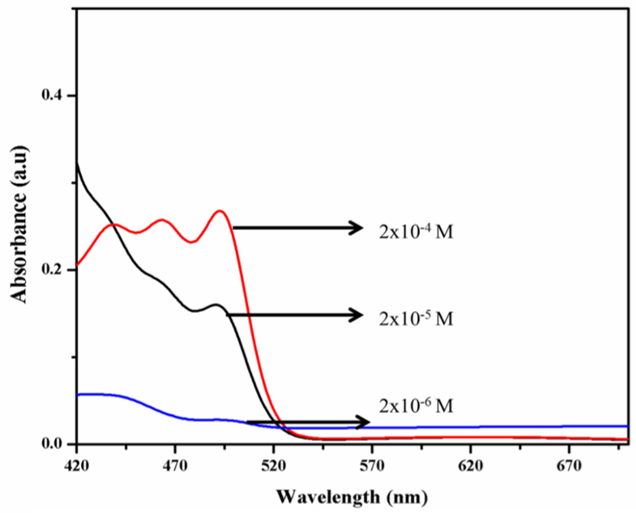


**Figure S5.** Absorbance Spectrum of compound **2NP**


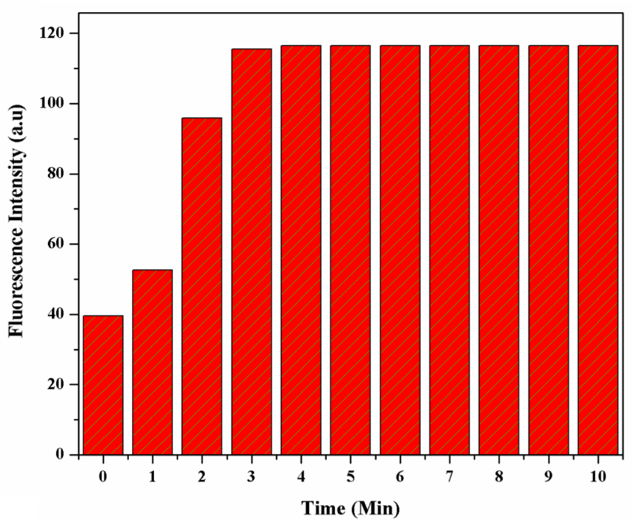


**Figure S6.** The response time study of receptor **2NP to Ag+.**


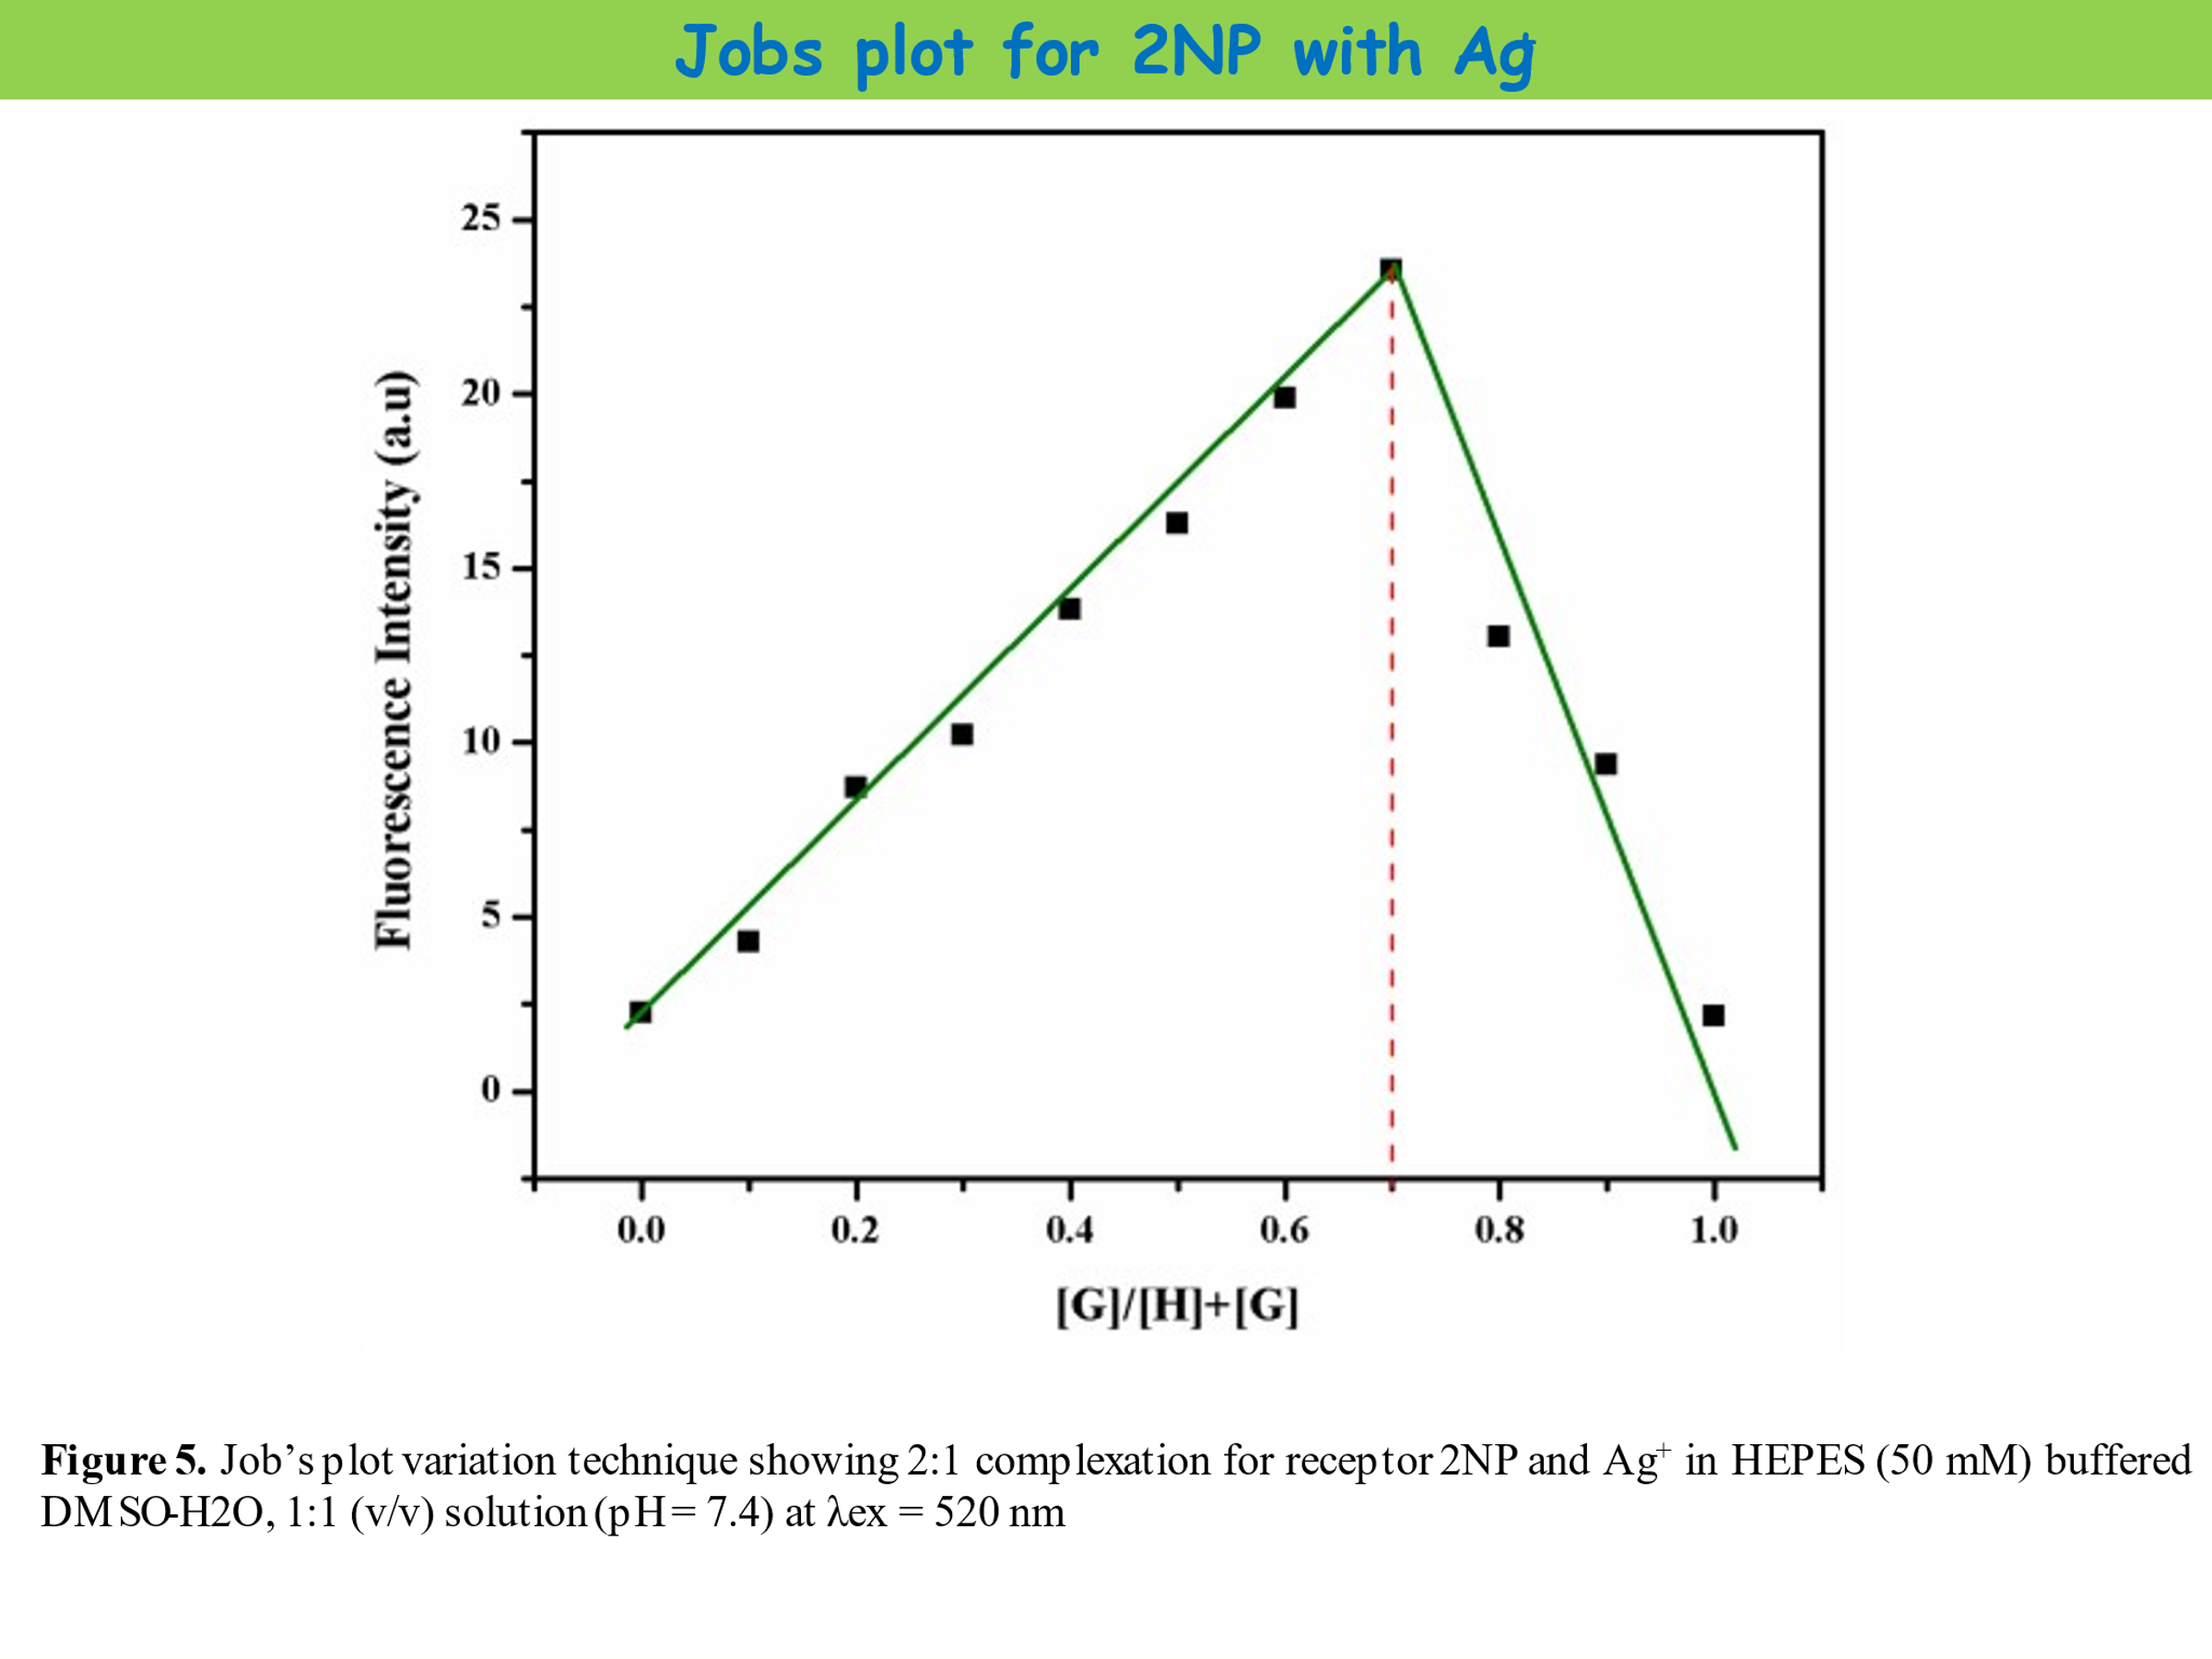


**Figure S7.** Job’s plot variation technique showing 2:1 complexation for receptor **2NP** and Ag+ in HEPES (50 mM) buffered DMSO-H2O, 1:1 (v/v) solution (pH = 7.4) at λex = 520 nm


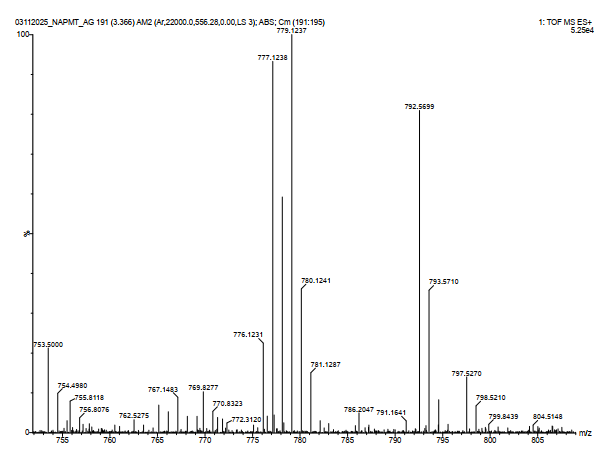


**Figure S8.** HRMS Spectrum of compound **2NP+Ag**

**
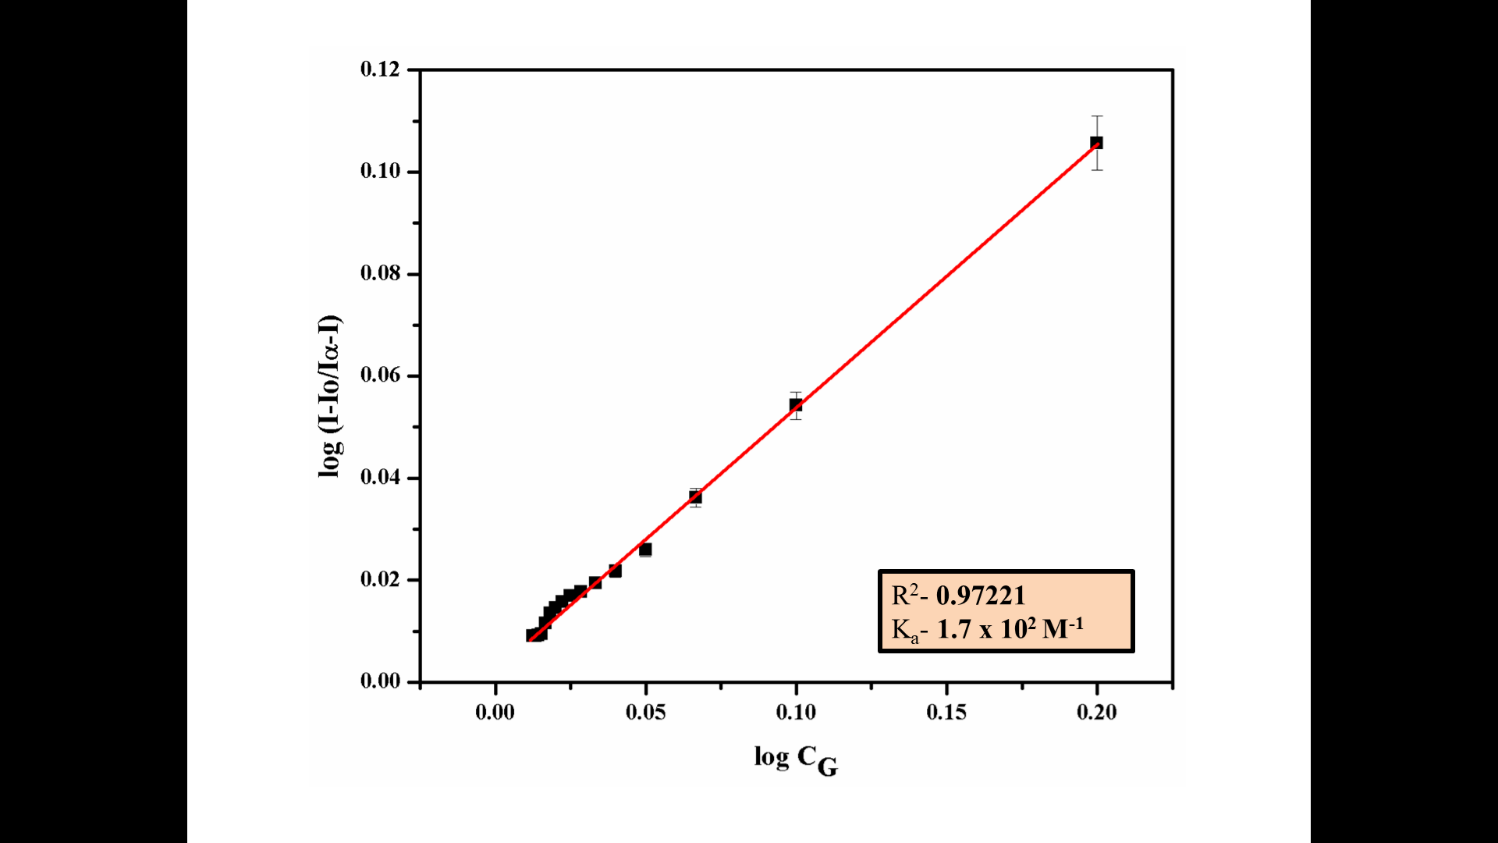
**

**Figure S9.** Benesi-Hildebrand plot for determination of association constant for receptor **2NP** in presence of various concentration of Ag+ at (λex = 520 nm). Error bars are representing standard deviation of three repeated experiments.


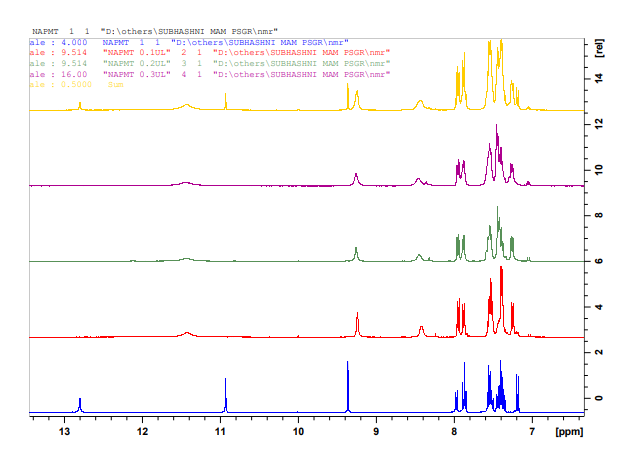


**Figure S10.** 1H NMR Titration Spectrum of compound 2NP with 4 equiv. Ag+ ions.

**Table S1.** Comparison of Bond lengths of the free 2NP and complex 2NP+ Ag+ ions

| S.NO | Bond | Ligand  2NP | Complex | ↓ ↑ |
| --- | --- | --- | --- | --- |
| 1 | C1-C2 | 1.390 | 1.392 | ↑ |
| 2 | C2-C3 | 1.428 | 1.423 | ↓ |
| 3 | C3-C4 | 1.440 | 1.436 | ↓ |
| 4 | C4-C5 | 1.430 | 1.428 | ↓ |
| 5 | C5-C6 | 1.391 | 1.395 | ↑ |
| 6 | C6-C1 | 1.425 | 1.419 | ↓ |
| 7 | C3-C10 | 1.433 | 1.439 | ↑ |
| 8 | C4-C11 | 1.445 | 1.466 | ↑ |
| 9 | C11-C14 | 1.404 | 1.438 | ↑ |
| 10 | C14-C15 | 1.426 | 1.450 | ↑ |
| 11 | C15-C10 | 1.381 | 1.372 | ↓ |
| 12 | C14-O40 | 1.392 | 1.326 | ↓ |
| 13 | C11-C17 | 1.486 | 1.432 | ↓ |
| 14 | C17-N19 | 1.310 | 1.327 | ↑ |
| 15 | N19-N20 | 1.394 | 1.440 | ↑ |
| 16 | N20-C22 | 1.397 | 1.400 | ↑ |
| 17 | C22-S23 | 1.729 | 1.736 | ↑ |
| 18 | C22-N24 | 1.374 | 1.365 | ↓ |
| 19 | N24-C25 | 1.482 | 1.480 | ↓ |
| 20 | N24-C29 | 1.451 | 1.451 | ↓ |
| 21 | C29-C30 | 1.407 | 1.408 | ↑ |
| 22 | C30-C32 | 1.406 | 1.406 | ↑ |
| 23 | C32-C36 | 1.409 | 1.409 | ↑ |
| 24 | C34-C36 | 1.409 | 1.409 | ↑ |
| 25 | C31-C34 | 1.408 | 1.408 | ↓ |
| 26 | C29-C31 | 1.411 | 1.409 | ↓ |

**Table S1** Cytotoxicity studies with L929 Mouse fibroblast cells.

| **Concentration** | **Cytotoxicity (%)** | **Cell Viability(%)** | **Cytotoxic Reactivity** |
| --- | --- | --- | --- |
| 5 | 8 | 92 | Slight |
| 25 | 10 | 90 |
| 50 | 12 | 88 |
| 75 | 14 | 86 |
| 100 | 17 | 83 |
